# Supplementary material
Source: HighWire-hosted journal article supplement (https://bmjopen.bmj.com/content/11/8/e046727)
Supplement: inline-supplementary-material-1 [file inline-supplementary-material-1.pdf]

## Search Strategy for PubMed

((((((((((((((((((Cardiomyopathy, Takotsubo[Title/Abstract]) OR (Stress Cardiomyopathy[Title/Abstract])) OR (Cardiomyopathy, Stress[Title/Abstract])) OR (Tako-tsubo Cardiomyopathy[Title/Abstract])) OR (Cardiomyopathy, Tako-tsubo[Title/Abstract])) OR (Tako tsubo Cardiomyopathy[Title/Abstract])) OR (Broken Heart Syndrome[Title/Abstract])) OR (Syndrome, Broken Heart[Title/Abstract])) OR (Syndromes, Broken Heart[Title/Abstract])) OR (Takotsubo Syndrome[Title/Abstract])) OR (Transient Apical Ballooning Syndrome[Title/Abstract])) OR (Apical Ballooning Syndrome[Title/Abstract])) OR (Syndrome, Apical Ballooning[Title/Abstract])) OR (Left Ventricular Apical Ballooning Syndrome[Title/Abstract])) OR (Tako-tsubo Syndrome[Title/Abstract])) OR (Syndrome, Tako-tsubo[Title/Abstract])) OR (Syndromes, Tako-tsubo[Title/Abstract])) OR (Tako tsubo Syndrome[Title/Abstract])) OR (Tako-tsubo Syndromes[Title/Abstract])) OR ("Takotsubo Cardiomyopathy"[Mesh])) AND ("Aspirin"[Mesh]) OR (((((((((((((((Acetylsalicylic Acid[Title/Abstract]) OR (Acid, Acetylsalicylic[Title/Abstract])) OR (2-(Acetyloxy)benzoic Acid[Title/Abstract])) OR (Acylpyrin[Title/Abstract])) OR (Aloxiiprium[Title/Abstract])) OR (Colfarit[Title/Abstract])) OR (Dispril[Title/Abstract])) OR (Easprin[Title/Abstract])) OR (Ecotrin[Title/Abstract])) OR (Endosprin[Title/Abstract])) OR (Magnecyl[Title/Abstract])) OR (Micristin[Title/Abstract])) OR (Polopirin[Title/Abstract])) OR (Polopiryna[Title/Abstract])) OR (Solprin[Title/Abstract])) OR (Solupsan[Title/Abstract])) OR (Zorprin[Title/Abstract])) OR (Acetysal[Title/Abstract]))

Time Range: inception to 1<sup>st</sup> August 2020
